# Supplementary material for: Nitrogen and phosphorus co-doped carbon dots as a “turn-off-on” fluorescence probe for the detection of Hg2+ and GSH and cell imaging
Source: Royal Society of Chemistry journal article supplement (doi:10.1039/c9ay01723b), 2019-01-01
Supplement: c9ay01723b1.pdf [file c9ay01723b1.pdf]

# Nitrogen and phosphorus co-doped carbon dots as a “turn-off-on” fluorescence probe for the detection of Hg<sup>2+</sup> and GSH and cell imaging

Xuefang Yang,<sup>a</sup> Mengting Zhang,<sup>b</sup> Yulu Zhang,<sup>b</sup> Ning Wang<sup>b</sup> and Wei Bian,<sup>\*b</sup> and Martin M.F. Choi<sup>c</sup>

<sup>a</sup> College of Pharmacy, Shanxi Medical University, 030001, Taiyua, China.

<sup>b</sup> School of Basic Medical Science, Shanxi Medical University, 030001, Taiyuan, China.

<sup>c</sup> Bristol Chinese Christian Church, c/o Tyndale Baptist Church, 137-139 Whiteladies Road, Bristol, BS8 2QG, United Kingdom

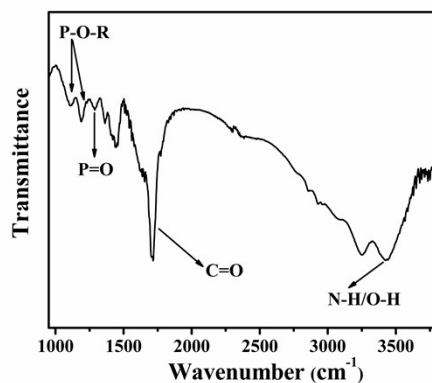

Fig. S1. FT-IR spectrum of NPCDs.

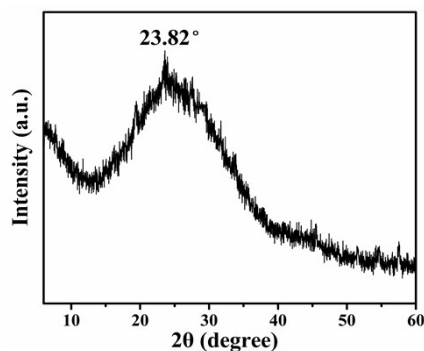

Fig. S2. XRD spectrum of NPCDs.

---

\* Corresponding author.

E-mail address: sxykdx\_bianwei@163.com.

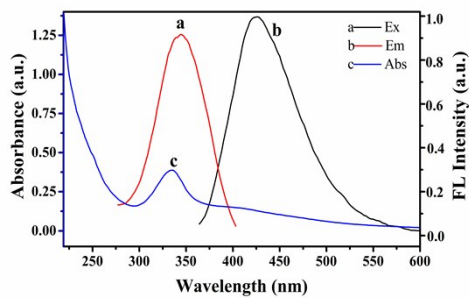

Fig. S3. The fluorescence excitation spectrum (a), The fluorescence emission spectrum of NPCDs (b), UV-Vis absorption spectrum (c).

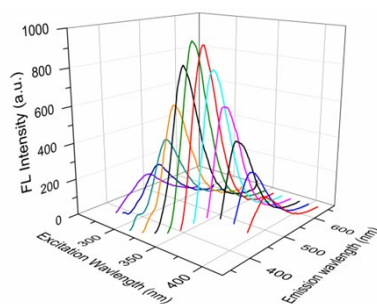

Fig. S4. 3D excitation-dependent fluorescence spectrum of NPCDs.

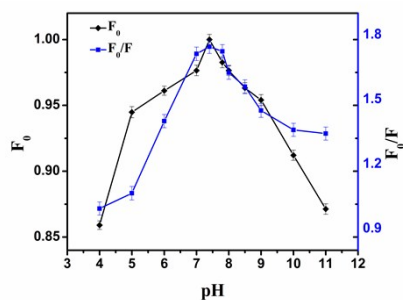

Fig. S5. The fluorescence intensity of NPCDs-Hg<sup>2+</sup> system and NPCDs-Hg<sup>2+</sup>-GSH system at different pH.

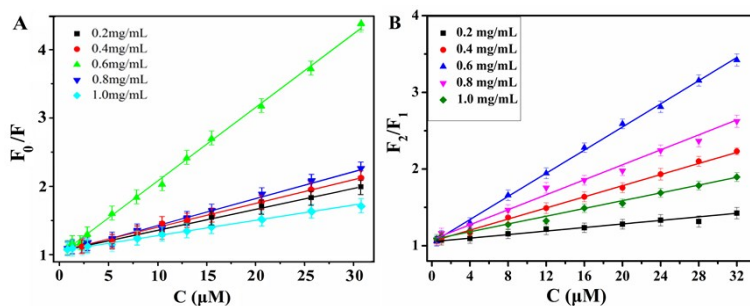

Fig. S6. Effect of the fluorescence intensity of NPCDs-Hg<sup>2+</sup> (A) and NPCDs-Hg<sup>2+</sup>-GSH (B) at 0.20-1.0 mg/mL NPCDs

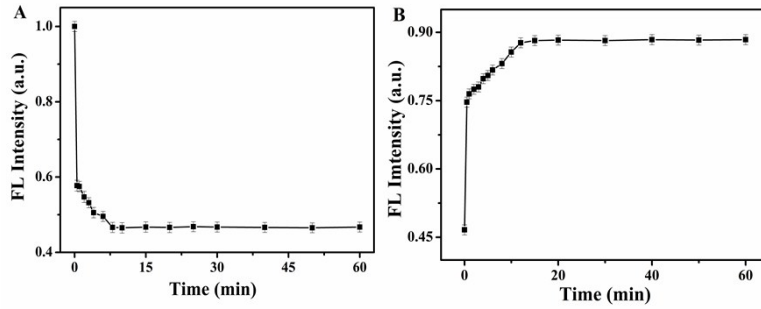

Fig. S7. The effect of the reaction time on the fluorescence intensity of NPCDs-Hg<sup>2+</sup> system (A), NPCDs-Hg<sup>2+</sup>-GSH system (B).

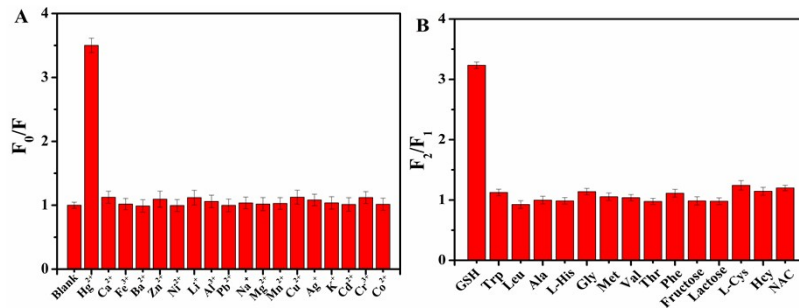

Fig. S8. The effect of different metal ions on the fluorescence intensity of NPCDs (A); The relative fluorescence intensity ratio ( $F_2/F_1$ ) of NPCDs-Hg<sup>2+</sup> system in the presence of GSH and other amino acids (B).

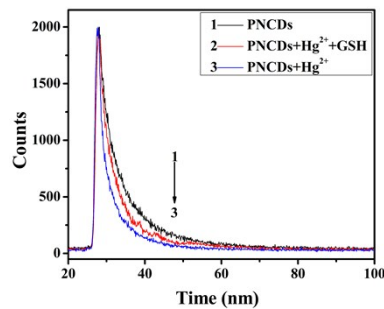

Fig. S9. The fluorescence lifetime in the presence of (1) NPCDs; (2) NPCDs- Hg<sup>2+</sup>-GSH system; (3) NPCDs- Hg<sup>2+</sup> system.

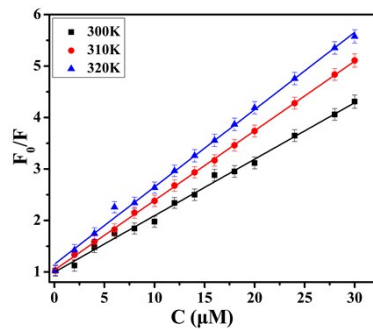

Fig. S10. Stern-Volmer curves of NPCDs-Hg<sup>2+</sup> system at different temperatures.

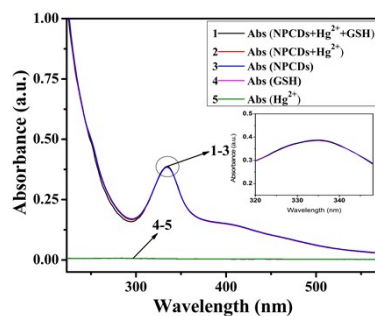

Fig. S11. UV-vis absorption spectra of (1) NPCDs-  $\text{Hg}^{2+}$ -GSH system, (2) NPCDs-  $\text{Hg}^{2+}$  system, (3) NPCDs, (4) GSH, and (5)  $\text{Hg}^{2+}$ .

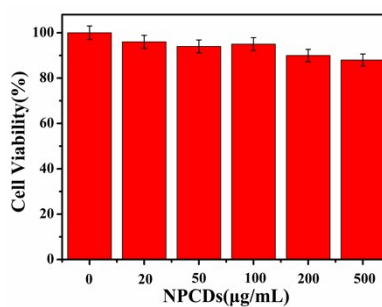

Fig. S12. Cells viability of at different NPCDs concentrations.

Table S1 The fluorescence intensity of NPCDs in the presence of  $\text{Hg}^{2+}$  with 40-fold interfering substances

| Interferents     | Concentration of interferent ( $\mu\text{M}$ ) | Change of fluorescence intensity (%) | Interferents                | Concentration of interferent ( $\mu\text{M}$ ) | Change of fluorescence intensity (%) |
|------------------|------------------------------------------------|--------------------------------------|-----------------------------|------------------------------------------------|--------------------------------------|
| $\text{Na}^+$    | 600                                            | 1.36                                 | Trp                         | 600                                            | -0.72                                |
| $\text{K}^+$     | 600                                            | 0.57                                 | Leu                         | 600                                            | 3.54                                 |
| $\text{Ca}^{2+}$ | 600                                            | -2.69                                | Ala                         | 600                                            | 1.39                                 |
| $\text{Ba}^{2+}$ | 600                                            | 1.13                                 | L-His                       | 600                                            | 2.84                                 |
| $\text{Mg}^{2+}$ | 600                                            | 0.50                                 | Gly                         | 600                                            | -0.76                                |
| $\text{Zn}^{2+}$ | 600                                            | 3.03                                 | Met                         | 600                                            | 1.50                                 |
| $\text{Fe}^{3+}$ | 600                                            | -1.43                                | Val                         | 600                                            | -0.65                                |
| $\text{Cu}^{2+}$ | 600                                            | -0.99                                | Thr                         | 600                                            | 2.14                                 |
| $\text{Ag}^+$    | 600                                            | 1.22                                 | Phe                         | 600                                            | 1.37                                 |
| $\text{Al}^{3+}$ | 600                                            | 0.97                                 | L-Cys                       | 600                                            | 2.44                                 |
| $\text{Co}^{2+}$ | 600                                            | -2.98                                | Hcy                         | 600                                            | -1.59                                |
| $\text{Cd}^{2+}$ | 600                                            | 1.05                                 | <i>N</i> -acetyl-L-cysteine | 600                                            | -0.72                                |
| $\text{Li}^+$    | 600                                            | -0.75                                | Fructose                    | 600                                            | 2.31                                 |
| $\text{Mn}^{2+}$ | 600                                            | -2.05                                | Lactose                     | 600                                            | 0.65                                 |
| $\text{Pb}^{2+}$ | 600                                            | 2.61                                 |                             |                                                |                                      |

Table S2 The fluorescence intensity of NPCDs- Hg<sup>2+</sup> system in the presence of GSH with 40-fold interfering substances

| Interferents     | Concentration of interferent (μM) | Change of fluorescence intensity (%) | Interferents        | Concentration of interferent (μM) | Change of fluorescence intensity (%) |
|------------------|-----------------------------------|--------------------------------------|---------------------|-----------------------------------|--------------------------------------|
| Na <sup>+</sup>  | 640                               | 0.36                                 | Trp                 | 640                               | 1.72                                 |
| K <sup>+</sup>   | 640                               | 1.41                                 | Leu                 | 640                               | 2.50                                 |
| Ca <sup>2+</sup> | 640                               | 1.68                                 | Ala                 | 640                               | -1.16                                |
| Ba <sup>2+</sup> | 640                               | -2.53                                | L-His               | 640                               | 1.39                                 |
| Mg <sup>2+</sup> | 640                               | 0.57                                 | Gly                 | 640                               | 0.53                                 |
| Zn <sup>2+</sup> | 640                               | -2.14                                | Met                 | 640                               | -0.87                                |
| Fe <sup>3+</sup> | 640                               | -1.43                                | Val                 | 640                               | 1.98                                 |
| Cu <sup>2+</sup> | 640                               | -3.29                                | Thr                 | 640                               | 3.04                                 |
| Ag <sup>+</sup>  | 640                               | 2.22                                 | Phe                 | 640                               | 0.76                                 |
| Al <sup>3+</sup> | 640                               | -1.87                                | L-Cys               | 640                               | -1.53                                |
| Co <sup>2+</sup> | 640                               | 1.35                                 | Hcy                 | 640                               | 0.63                                 |
| Cd <sup>2+</sup> | 640                               | -2.13                                | N-acetyl-L-cysteine | 640                               | 2.14                                 |
| Li <sup>+</sup>  | 640                               | 0.69                                 | Fructose            | 640                               | -2.01                                |
| Mn <sup>2+</sup> | 640                               | -1.05                                | Lactose             | 640                               | 1.73                                 |
| Pb <sup>2+</sup> | 640                               | 3.11                                 |                     |                                   |                                      |

Table S3 Average fluorescence lifetime ( $\tau$ ) of NPCDs, NPCDs+Hg<sup>2+</sup> and NPCDs+Hg<sup>2+</sup>+GSH Hg<sup>2+</sup> and the fitting parameters of the biexponential fitting curves

| Sample                      | B <sub>1</sub> | B <sub>2</sub> | $\tau_1$ | $\tau_2$ | $\tau$ (ns) |
|-----------------------------|----------------|----------------|----------|----------|-------------|
| NPCDs                       | 1082.58        | 731.85         | 3.12     | 10.62    | 6.15        |
| NPCDs+Hg <sup>2+</sup>      | 1064.25        | 786.08         | 2.78     | 9.56     | 5.69        |
| NPCDs+Hg <sup>2+</sup> +GSH | 1055.24        | 805.10         | 2.99     | 9.88     | 5.97        |

Table S4 Determination of Hg<sup>2+</sup> in biological samples

| Samples | Added ( $\mu\text{M}$ ) | Found ( $\mu\text{M}$ ) | Recovery (%) | RSD (%) |
|---------|-------------------------|-------------------------|--------------|---------|
| Urine   | 6.00                    | 5.80                    | 96.70        | 2.3     |
|         | 12.00                   | 12.31                   | 102.50       | 1.1     |
|         | 18.00                   | 18.10                   | 100.60       | 3.1     |
| Serum   | 6.00                    | 6.20                    | 103.30       | 2.5     |
|         | 12.00                   | 11.83                   | 98.30        | 1.6     |
|         | 18.00                   | 18.32                   | 101.71       | 2.1     |

Table S5 Determination of GSH in biological samples

| Samples      | Concentration of GSH    |                         | Recovery (%) | RSD (n=3) (%) |
|--------------|-------------------------|-------------------------|--------------|---------------|
|              | Added ( $\mu\text{M}$ ) | Found ( $\mu\text{M}$ ) |              |               |
| Urine sample | 6.00                    | 6.17                    | 102.83       | 2.8           |
|              | 12.00                   | 12.25                   | 102.08       | 1.4           |
|              | 18.00                   | 17.54                   | 97.44        | 3.2           |
| Serum sample | 6.00                    | 9.46                    | 101.28       | 2.6           |
|              | 12.00                   | 15.06                   | 99.41        | 3.0           |
|              | 18.00                   | 21.02                   | 98.50        | 3.1           |
